# Supplementary material for: Impact of Whole-Genome Sequencing of Mycobacterium tuberculosis on Treatment Outcomes for MDR-TB/XDR-TB: A Systematic Review
Source: MDPI journal article supplement (doi:10.3390/pharmaceutics15122782), 2023-12-15
Supplement: s1 [file s1]

## Supplementary File S2:

### Search Strategy

|        |                                                                                                                                                                                                                                                                                                                                                                                                                                                                                                                                                                                                                                                                                                                                                                                                                                                                                                                                                                                                                                                                                                                                                                                                                                                                                                                                                                                                                                                                                                       |
|--------|-------------------------------------------------------------------------------------------------------------------------------------------------------------------------------------------------------------------------------------------------------------------------------------------------------------------------------------------------------------------------------------------------------------------------------------------------------------------------------------------------------------------------------------------------------------------------------------------------------------------------------------------------------------------------------------------------------------------------------------------------------------------------------------------------------------------------------------------------------------------------------------------------------------------------------------------------------------------------------------------------------------------------------------------------------------------------------------------------------------------------------------------------------------------------------------------------------------------------------------------------------------------------------------------------------------------------------------------------------------------------------------------------------------------------------------------------------------------------------------------------------|
| PubMed | <p>1. (((((((((((((((("Multidrug resistant tuberculosis") OR ("tuberculosis, multidrug-resistant"[MeSH Terms])) OR ("MDR TB")) OR ("Multidrug resistant mycobacterium tuberculosis")) OR ("Multidrug resistant tb")) OR ("Multidrug resistant mtb")) OR ("Extensively Drug Resistant Tuberculosis"[MeSH Terms])) OR ("Extensively Drug Resistant Tuberculosis")) OR ("XDR TB")) OR ("Extensively Drug Resistant TB")) OR ("Extensively Drug Resistant mtb")) OR ("Extensively Drug Resistant Mycobacterium tuberculosis")) OR (resistan* tuberculosis)) OR (resistan* mycobacterium tuberculosis)) OR (resistan* tb)) OR (resistan* mtb)) OR (drug resistan* tuberculosis)) OR (drug resistan* tb)) OR (drug resistan* mtb)) OR (drug resistan* mycobacterium tuberculosis)</p> <p>2. (((((((((((((((("treatment outcome"[MeSH Terms]) OR ("treatment outcome")) OR (clinical outcome*)) OR ("Clinical application")) OR (treatment outcome*)) OR ("patient outcome assessment"[MeSH Terms])) OR ("patient outcome assessment")) OR (patient* outcome*)) OR ("outcome assessment")) OR ("treatment response")) OR ("long-term outcome")) OR ("treatment failure"[MeSH Terms])) OR ("treatment failure")) OR (prognosis[MeSH Terms])) OR (Prediction outcome*)) OR (Therapeutic* outcome*)) OR ("cohort study")) OR ("clinical trial")</p> <p>3. (((((((((((((((("whole genome sequencing"[MeSH Terms]) OR ("whole genome sequencing")) OR (WGS)) OR ("high-throughput nucleotide sequencing"[MeSH</p> |
|--------|-------------------------------------------------------------------------------------------------------------------------------------------------------------------------------------------------------------------------------------------------------------------------------------------------------------------------------------------------------------------------------------------------------------------------------------------------------------------------------------------------------------------------------------------------------------------------------------------------------------------------------------------------------------------------------------------------------------------------------------------------------------------------------------------------------------------------------------------------------------------------------------------------------------------------------------------------------------------------------------------------------------------------------------------------------------------------------------------------------------------------------------------------------------------------------------------------------------------------------------------------------------------------------------------------------------------------------------------------------------------------------------------------------------------------------------------------------------------------------------------------------|

|  |                                                                                                                                                                                                                                                                                                                                                                                                                              |
|--|------------------------------------------------------------------------------------------------------------------------------------------------------------------------------------------------------------------------------------------------------------------------------------------------------------------------------------------------------------------------------------------------------------------------------|
|  | <p>Terms])) OR ("high-throughput nucleotide sequencing")) OR ("next-generation sequencing")) OR (NGS)) OR ("complete genome sequencing")) OR (mutation*))</p> <p>OR (gene* mutation*)) OR ("genomic mutation")) OR (gene sequenc*)) OR (genomic sequenc*))</p> <p>4. 1 AND 2</p> <p>5. 4 AND 3 Filters: Multicenter Study, Observational Study, Randomized Controlled Trial, Humans, English, from 2000/1/1 - 2020/12/31</p> |
|--|------------------------------------------------------------------------------------------------------------------------------------------------------------------------------------------------------------------------------------------------------------------------------------------------------------------------------------------------------------------------------------------------------------------------------|
